# Supplementary material
Source: PubMed Central journal article supplement (PMC1851027)

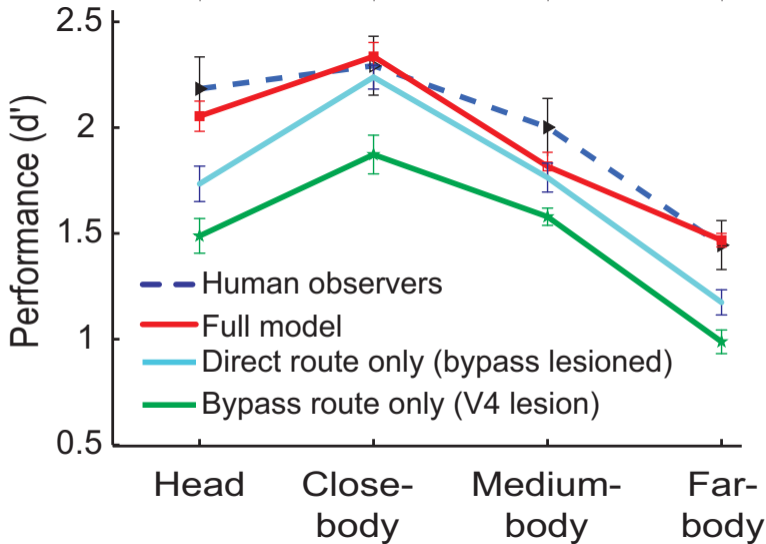

Supplement: pnas_0700622104_1.pdf [file pnas_0700622104_1.pdf]

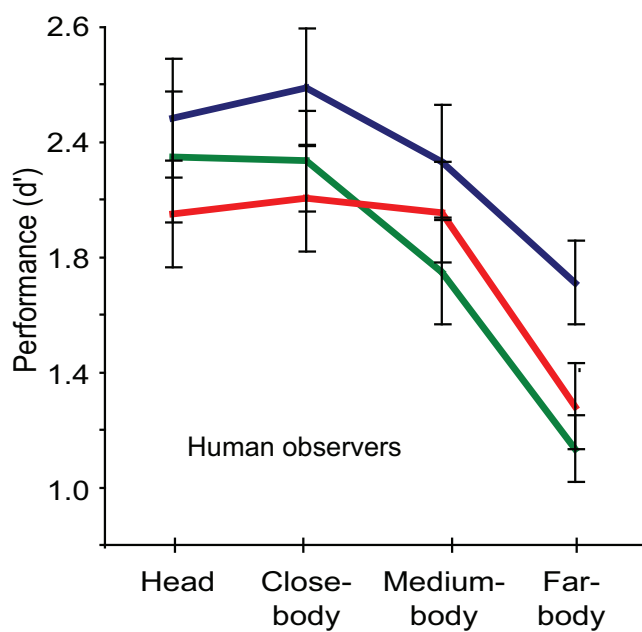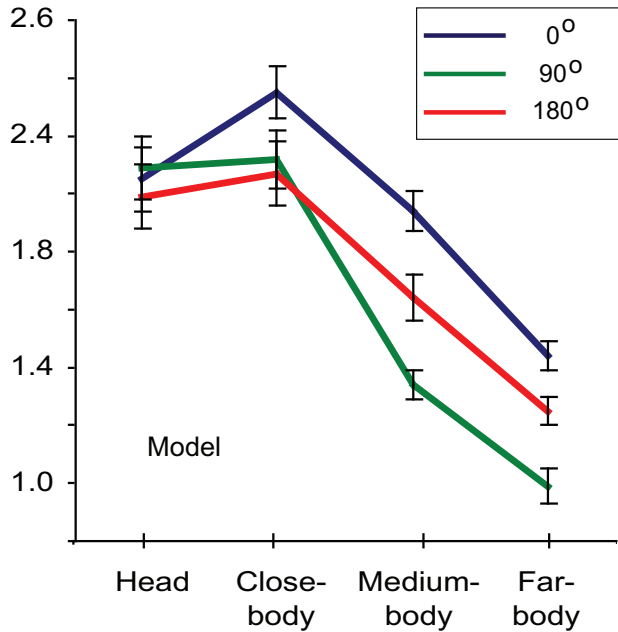

Supplement: pnas_0700622104_2.pdf [file pnas_0700622104_2.pdf]

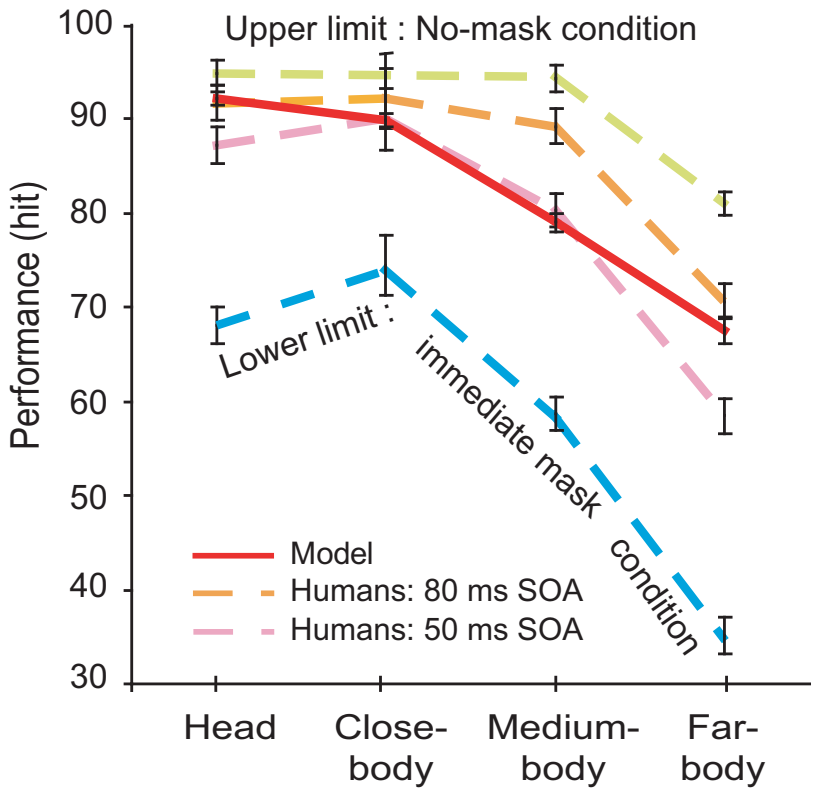

Supplement: pnas_0700622104_3.pdf [file pnas_0700622104_3.pdf]
